# Supplementary material for: Hormonal signaling cascades required for phototaxis switch in wandering Leptinotarsa decemlineata larvae
Source: PubMed Central journal article supplement (PMC6336328; doi:10.1371/journal.pgen.1007423), 2019-01-07
Supplement: pgen.1007423.s011.pdf [file pgen.1007423.s011.pdf]

| Bioassay                                                        | Treatments                         | Days from ecdysis to the onset of wandering |
|-----------------------------------------------------------------|------------------------------------|---------------------------------------------|
| 20E ingestion                                                   | CK                                 | 4.7±0.4 b                                   |
|                                                                 | 20E                                | 4.0±0.3 a                                   |
| 20E signal disturbance                                          | CK                                 | 4.5±0.2 a                                   |
|                                                                 | <i>dsefp</i>                       | 4.6±0.3 a                                   |
|                                                                 | <i>dsSHD</i>                       | 5.3±0.2 b                                   |
|                                                                 | <i>dsEcR</i>                       | 5.4±0.4 b                                   |
|                                                                 | <i>dsHR3</i>                       | 5.2±0.3 b                                   |
| ILP2 knockdown                                                  | CK                                 | 4.7±0.4 a                                   |
|                                                                 | <i>dsefp</i>                       | 4.5±0.2 a                                   |
|                                                                 | <i>dsILP2</i>                      | 5.4±0.3 b                                   |
| JH ingestion                                                    | CK                                 | 4.6±0.2 a                                   |
|                                                                 | JH                                 | 5.5±0.4 b                                   |
| An increase in JH titer                                         | CK                                 | 4.7±0.4 a                                   |
|                                                                 | <i>dsefp</i>                       | 4.6±0.3 a                                   |
|                                                                 | <i>dsAS-C</i>                      | 5.4±0.2 b                                   |
|                                                                 | <i>dsJHEH1</i>                     | 5.1±0.2 ab                                  |
|                                                                 | <i>dsJHDK</i>                      | 4.8±0.2 a                                   |
| JH signal interruption                                          | CK                                 | 4.7±0.2 b                                   |
|                                                                 | <i>dsefp</i>                       | 4.8±0.1 b                                   |
|                                                                 | <i>dsJHAMT</i>                     | 4.0±0.2 a                                   |
|                                                                 | <i>dsMet</i>                       | 4.1±0.3 a                                   |
| Knockdown of <i>LdPTTH</i>                                      | CK                                 | 4.5±0.3 b                                   |
|                                                                 | <i>dsefp</i>                       | 4.6±0.2 b                                   |
|                                                                 | <i>dsPTTH</i>                      | 5.8±0.3 a                                   |
|                                                                 | 20E                                | 3.7±0.4 c                                   |
|                                                                 | <i>dsPTTH</i> +20E                 | 4.7±0.4 b                                   |
| Knockdown of <i>LdTorso</i>                                     | CK                                 | 4.7±0.2 b                                   |
|                                                                 | <i>dsefp</i>                       | 4.5±0.4 b                                   |
|                                                                 | <i>dsTorso</i>                     | 5.9±0.3 a                                   |
|                                                                 | 20E                                | 3.8±0.4 c                                   |
| <i>dsTorso</i> +20E                                             | 4.8±0.3 b                          |                                             |
| A combination of <i>LdPTTH</i> knockdown and JH/20E application | <i>dsefp</i>                       | 4.6±0.4 b                                   |
|                                                                 | <i>dsefp</i> +JH                   | 5.5±0.2 a                                   |
|                                                                 | <i>dsPTTH</i>                      | 5.8±0.3 a                                   |
|                                                                 | <i>dsPTTH</i> +JH                  | 5.9±0.2 a                                   |
|                                                                 | <i>dsPTTH</i> +JH+20E              | 4.7±0.3 b                                   |
| A combination of knockdown <i>LdPTTH</i> and <i>LdAS-C</i>      | <i>dsefp</i>                       | 4.5±0.3 b                                   |
|                                                                 | <i>dsefp</i> + <i>dsAS-C</i>       | 5.1±0.4 ab                                  |
|                                                                 | <i>dsPTTH</i>                      | 5.9±0.3 a                                   |
|                                                                 | <i>dsPTTH</i> + <i>dsAS-C</i>      | 5.8±0.4 a                                   |
|                                                                 | <i>dsPTTH</i> + <i>dsAS-C</i> +20E | 4.8±0.2 b                                   |
| A combination of knockdown <i>LdPTTH</i> and <i>LdJHAMT</i>     | <i>dsefp</i>                       | 4.6±0.4 b                                   |
|                                                                 | <i>dsefp</i> + <i>dsJHAMT</i>      | 4.1±0.3 c                                   |
|                                                                 | <i>dsPTTH</i>                      | 5.7±0.3 a                                   |
|                                                                 | <i>dsPTTH</i> + <i>dsJHAMT</i>     | 5.8±0.2 a                                   |

|                                                                         |                     |           |
|-------------------------------------------------------------------------|---------------------|-----------|
|                                                                         | dsPTTH+dsJHAMT+20E  | 4.5±0.3 b |
| <b>A combination of knockdown <i>LdPTTH</i> and <i>LdMet</i></b>        | dsegfp              | 4.6±0.3 b |
|                                                                         | dsegfp+dsMet        | 3.9±0.2 c |
|                                                                         | dsMet               | 5.9±0.3 a |
|                                                                         | dsPTTH+dsMet        | 5.8±0.4 a |
|                                                                         | dsPTTH+dsMet+20E    | 4.7±0.3 b |
| <b>A combination of <i>LdTorso</i> knockdown and JH/20E application</b> | dsegfp              | 4.6±0.3 b |
|                                                                         | dsegfp+JH           | 5.8±0.4 a |
|                                                                         | dsTorso             | 5.7±0.3 a |
|                                                                         | dsTorso+JH          | 5.6±0.4 a |
|                                                                         | dsTorso+JH+20E      | 4.6±0.2 b |
| <b>A combination of knockdown <i>LdTorso</i> and <i>LdAS-C</i></b>      | dsegfp              | 4.5±0.3 b |
|                                                                         | dsegfp+dsAS-C       | 5.9±0.2 a |
|                                                                         | dsTorso             | 5.8±0.3 a |
|                                                                         | dsTorso+dsAS-C      | 6.0±0.5 a |
|                                                                         | dsTorso+dsAS-C+20E  | 4.8±0.2 b |
| <b>A combination of knockdown <i>LdTorso</i> and <i>LdJHAMT</i></b>     | dsegfp              | 4.5±0.4 b |
|                                                                         | dsegfp+dsJHAMT      | 3.8±0.2 c |
|                                                                         | dsTorso             | 5.8±0.3 a |
|                                                                         | dsTorso+dsJHAMT     | 5.6±0.3 a |
|                                                                         | dsTorso+dsJHAMT+20E | 4.6±0.4 b |
| <b>A combination of knockdown <i>LdTorso</i> and <i>LdMet</i></b>       | dsegfp              | 4.7±0.3 b |
|                                                                         | dsegfp+dsMet        | 4.0±0.2 c |
|                                                                         | dsMet               | 5.7±0.3 a |
|                                                                         | dsTorso+dsMet       | 5.8±0.3 a |
|                                                                         | dsTorso+dsMet+20E   | 4.5±0.4 b |

---
