# Supplementary material for: Hormonal signaling cascades required for phototaxis switch in wandering Leptinotarsa decemlineata larvae
Source: PubMed Central journal article supplement (PMC6336328; doi:10.1371/journal.pgen.1007423), 2019-01-07
Supplement: pgen.1007423.s012.pdf [file pgen.1007423.s012.pdf]

| Fragment name                                | Forward primer              | Reverse primer              |
|----------------------------------------------|-----------------------------|-----------------------------|
| <b>dsRNA synthesis (bacterially)</b>         |                             |                             |
| ds <i>SHD</i>                                | CTCTTCCTCGGTTATTCTTGCC      | ATGCAAACCAGTTCAGGCC         |
| ds <i>EcR</i>                                | ACTGCTCCGAGAAGACCAAAT       | ATTTTCTCCACTTTCAGCCT        |
| ds <i>HR3</i>                                | GTGGAATAATGTAACGACCAAG      | GAAGACGGCAGTACTGGC          |
| ds <i>ILP2</i>                               | GTCCTCCTCGTCATCCTT          | GTAACCTGTCGTGTCCA           |
| ds <i>AS-C</i>                               | GGCATCTGGGAGAAAATAG         | GAAGTAGCAGGCTCTGAATCT       |
| ds <i>JHEH1</i>                              | CTTCCTCATTATAGTCACA         | CCTCAAGAGGTGGTGTTA          |
| ds <i>JHDK</i>                               | ATCAGAGCGGCACCATAG          | CTTCCCCTCAGCCATTTT          |
| ds <i>JHAMT</i>                              | GGACAAGCCCGACTTATACTC       | GCGAACTCCACCTCATCAA         |
| ds <i>Met</i>                                | ACCTCTCCCGAAGACCACG         | GCAACCTATTATGCGACCG         |
| ds <i>PTTH</i>                               | TTGCTTCTAGTAACAACCCA        | GAGTCTCAGATAATGGTCGG        |
| ds <i>Torso</i>                              | CTAAATTCAAACCCCTTC          | TCCCGTTACATTGCTACT          |
| ds <i>TrpA1</i>                              | ACATTAATTGACTTGGGGC         | GTGTCAATCCACCACCATCA        |
| ds <i>Trp</i>                                | TCATCCGCCCTAGTGATA          | TTTGATTTGGGCTGAGAT          |
| ds <i>NAT1</i>                               | TTTCATACCCAGAAGCTA          | CCATGCTGTGTTTTCTGTCA        |
| ds <i>segfp</i>                              | ACGTGACCACCCTGACCTA         | GATGCCGTTCTTCTGCTTG         |
| <b>dsRNA synthesis (lab-biosynthesizing)</b> |                             |                             |
| ds <i>Trp</i>                                | GGATCCTAATACGACTCACTATAGGGT | GGATCCTAATACGACTCACTATAGGGT |
|                                              | CATCCGCCCTAGTGATA           | TTGATTTGGGCTGAGAT           |
| ds <i>NAT1</i>                               | GGATCCTAATACGACTCACTATAGGGT | GGATCCTAATACGACTCACTATAGGGC |
|                                              | TCATACCCAGAAGCTA            | CATGCTGTGTTTTCTGTCA         |
| ds <i>segfp</i>                              | GGATCCTAATACGACTCACTATAGGGA | GGATCCTAATACGACTCACTATAGGGG |
|                                              | CGTGACCACCCTGACCTA          | ATGCCGTTCTTCTGCTTG          |
| <b>qRT-PCR</b>                               |                             |                             |
| q <i>LdSHD</i>                               | GGCCTGAACTGGTTTGCAT         | GGCAAGAATAACCGAGGAAGAG      |
| q <i>LdPHM</i>                               | GGAGAAAACCTCGGAAAAGTGAAGA   | CACCAAATAAATCAGCCAGCAA      |
| q <i>LdEcR</i>                               | GAATGAGGGCAGAGTGTGTG        | TCGTAGTGCTATTGGGCTTG        |
| q <i>LdHR3</i>                               | GCATCATCCAGCAAATCATC        | CTGATCGTCTTGCGACAACT        |
| q <i>LdFTZ-F1-1</i>                          | GGCTAATCAGGCCTCCAG          | CATGGTTTGCTGGCAACTAC        |

|                    |                           |                          |
|--------------------|---------------------------|--------------------------|
| <i>qLdFTZ-F1-2</i> | ATGCATGAAGAAGCGACAAG      | CTTCCAAATCCACTTCAGCA     |
| <i>qLdILP2</i>     | GTCCTCCTCGTCATCCTTGT      | CCTGGGTTCTTGTCGTGTTA     |
| <i>qLdInR</i>      | TCTCAAGCGAATCAGAGGTG      | GTTACGCCAATCCCAAAGTT     |
| <i>qLd4EBP</i>     | TGCAGGGAGATCTCAACAAA      | CAGAGAAGATCAACAAGCAGGA   |
| <i>qLdAS-C</i>     | ATGCAAGGCTTTCTCCATCT      | TTGATTGTTGTCCGGGTCTA     |
| <i>qLdKr-h1</i>    | ATCAAGTGCCATTCCGAAAGCAA   | ATGTCGGAATCATAGCTGACGGGT |
| <i>qLdJHEH1</i>    | TGCAAGCTACGAAACCTGAC      | TTGGTGCCAGATGTGAATTT     |
| <i>qLdJHDK</i>     | GTGTTACGGGCTGGATACCT      | AGATGAAGTTACCGGGATCG     |
| <i>qLdJHAMT</i>    | GGAAGTGGAGATGGCAAGTT      | CTACCAACGAGTTTCCCGAT     |
| <i>qLdMet</i>      | GCGACTCCGCTAACAGTGTA      | AGATCCCTTCCTGGTTGTTG     |
| <i>qLdPTTH</i>     | TCCAAACTGGATCCTGTCAA      | CACAGAGGAGGTTTCGTCAA     |
| <i>qLdTorso</i>    | CCAAAGTGCAGACTCCTCAA      | CTTTGTTGCTCCCTCTTCC      |
| <i>qLdRas</i>      | GACGTACAGGGAGCAGATCA      | CTTGGCGACCTCTCTAGCTT     |
| <i>qLdRh5</i>      | TGGCTCGCCTGCCAGATTTA      | TTCCCATCAAACGGCCTCGT     |
| <i>qLdGr28b</i>    | TGTTGTAACAGCTTACTTCACA    | TAGGAAGTGGACATCGTCAT     |
| <i>qLdTrpA1</i>    | GGTGGTGGATTGACACCTCT      | GTCCCTGTGCAACAAAGCTC     |
| <i>qLdTrp</i>      | TGACCGCATCTCAGCCCAA       | AGGAGCTGCATCGCAAAGGA     |
| <i>qLdNAT1</i>     | CCGGCACAGGCTTAGCATTCAATTT | AGAGCTATCAGGCTTCCAACCTCT |
| <i>qLdRP18</i>     | TAGAATCCTCAAAGCAGGTGGCGA  | AGCTGGACCAAAGTGTTTCACTGC |
| <i>qLdRP4</i>      | AAAGAAACGAGCATTGCCCTTCCG  | TTGTCGCTGACACTGTAGGGTTGA |
| <i>qLdARF1</i>     | CGGTGCTGGTAAAACGACAA      | TGACCTCCCAAATCCCAAAC     |
| <i>qLdARF4</i>     | GTGCTCGTGAACCATGTGAA      | AACCTCCAATCCCTCGTGAA     |

---
